# Supplementary material
Source: publisher figshare collection journal article supplement (https://acs.figshare.com/ndownloader/files/12533159)
Supplement: Supplementary file 1 [file 12533159]

## Supporting information

### **Chemical Transformation of Methanesulfonic Acid and Sodium Methanesulfonate through Heterogeneous OH Oxidation**

Kai Chung Kwong<sup>1</sup>, Man Mei Chim<sup>1</sup>, Erik Hans Hoffmann<sup>2</sup>, Andreas Tilgner<sup>2</sup>, Hartmut Herrmann<sup>2</sup>, James F. Davies<sup>3</sup>, Kevin R. Wilson<sup>4</sup>, Man Nin Chan<sup>1,5\*</sup>

<sup>1</sup>Earth System Science Programme, Faculty of Science, The Chinese University of Hong Kong, Hong Kong, CHINA

<sup>2</sup>Atmospheric Chemistry Department (ACD), Leibniz Institute for Tropospheric Research (TROPOS), Leipzig, GERMANY

<sup>3</sup>Department of Chemistry, University of California Riverside, Riverside, USA

<sup>4</sup>Chemical Sciences Division, Lawrence Berkeley National Laboratory, Berkeley, USA

<sup>5</sup>The Institute of Environment, Energy and Sustainability, The Chinese University of Hong Kong, Hong Kong, CHINA

\*Correspondence to: Man Nin Chan (mnchan@cuhk.edu.hk)

**Table S1.** Chemical structure of sodium methyl sulfate

| Chemical                                 | Sodium Methyl Sulfate                                                                                                                                                                               |
|------------------------------------------|-----------------------------------------------------------------------------------------------------------------------------------------------------------------------------------------------------|
| Structural formula                       | $\begin{array}{c} \text{H} \quad \quad \text{O} \\   \quad \quad    \\ \text{H}-\text{C}-\text{O}-\text{S}-\text{O}^- \text{Na}^+ \\   \quad \quad    \\ \text{H} \quad \quad \text{O} \end{array}$ |
| Molecular formula                        | $\text{CH}_3\text{SO}_4\text{Na}$                                                                                                                                                                   |
| Molecular weight ( $\text{g mol}^{-1}$ ) | 134.0867                                                                                                                                                                                            |

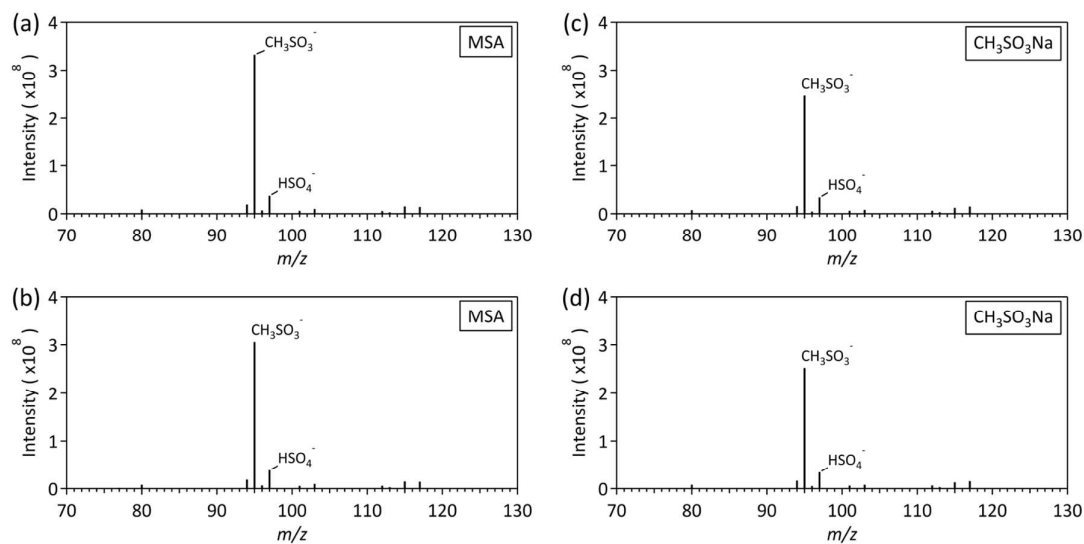

**Figure S1.** DART-aerosol mass spectra of MSA (left panel): (a) presence of UV light and absence of ozone; (b) absence of UV light and presence of ozone; and  $\text{CH}_3\text{SO}_3\text{Na}$  (right panel): (c) presence of UV light and absence of ozone; (d) absence of UV light and presence of ozone.

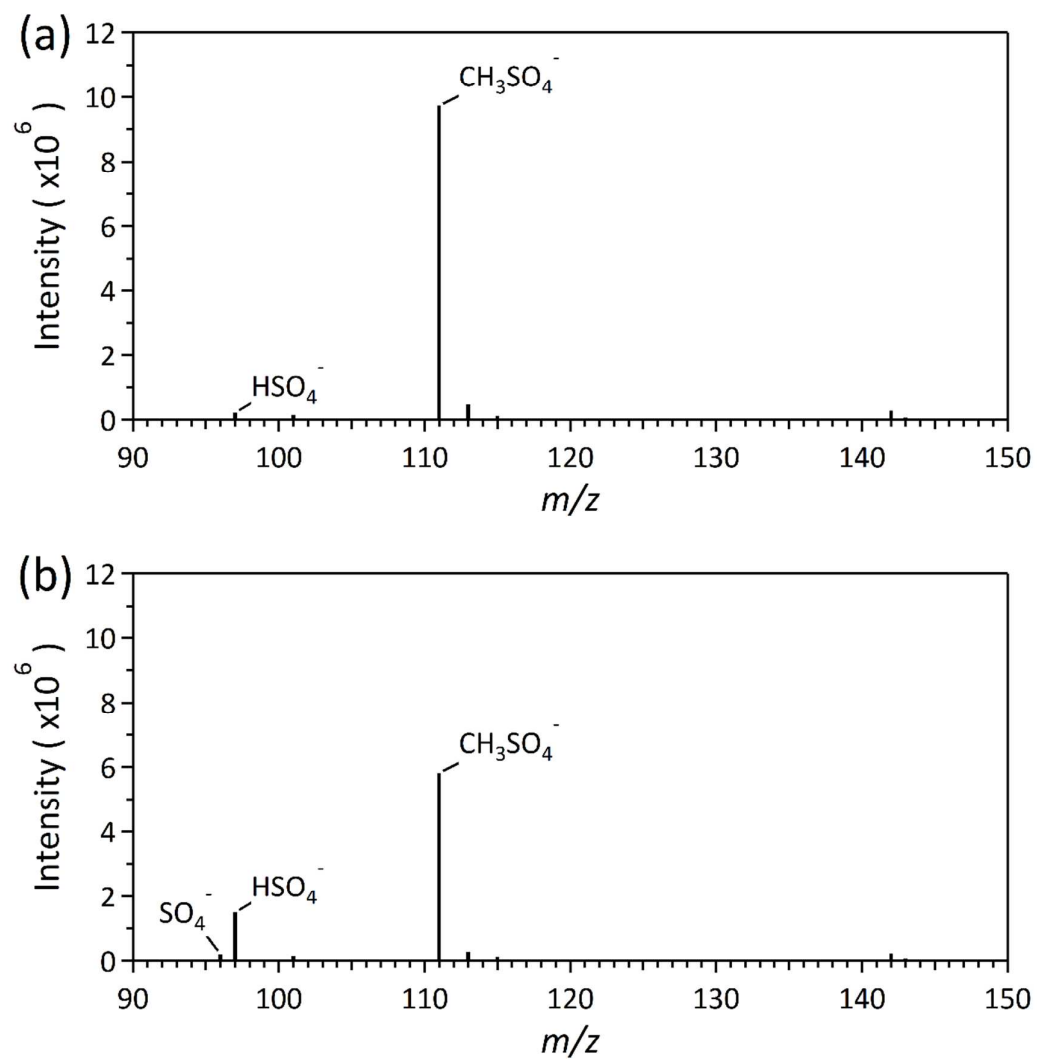

**Figure S2.** DART-Aerosol mass spectra of sodium methyl sulfate before (a) and after (b) oxidation (reproduced from *Kwong et al., 2018*).

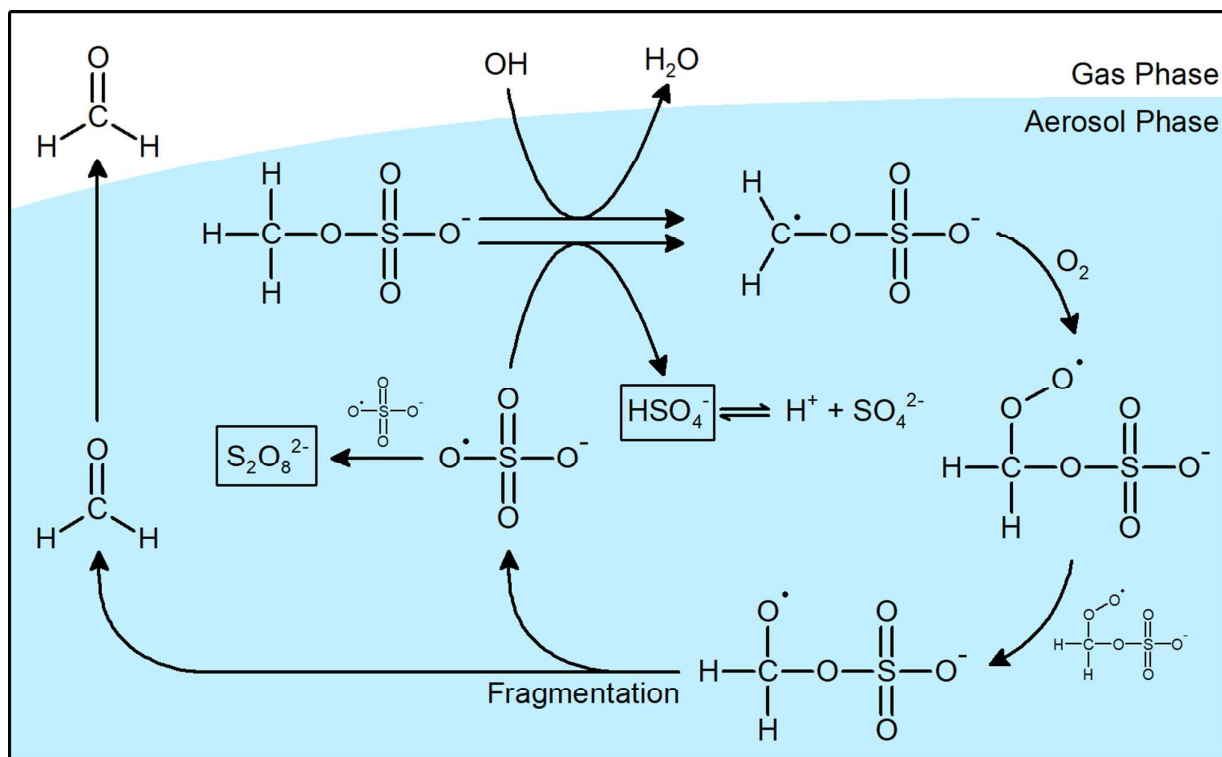

**Scheme S1.** Proposed reaction mechanism for heterogeneous OH oxidation of sodium methyl sulfate.

## Reference

Kwong, K. C.; Chim, M. M.; Davies, J. F.; Wilson, K. R.; Chan, M. N. Importance of Sulfate Radical Anion Formation and Chemistry in Heterogeneous OH Oxidation of Sodium Methyl Sulfate, the Smallest Organosulfate. *Atmos. Chem. Phys.*, **2018**, 18, 2809–2820.
